# Supplementary material for: N-terminal pyroglutamate formation in CX3CL1 is essential for its full biologic activity
Source: PubMed Central journal article supplement (PMC5634468; doi:10.1042/bsr20170712), 2017-08-24

## Supplemental information

### Supplemental Table 1.

Pooled siRNAs consisted of 4 single siRNAs with the following sequences

| siRNA                     | Thermo Scientific ON-TARGETplus SMARTpool<br>(Dharmacon RNAi Technologie) |                        |
|---------------------------|---------------------------------------------------------------------------|------------------------|
| <b>pooled QPCT-siRNA</b>  | consist of                                                                | target sequence        |
| QPCT_1                    | J-012474-05, QPCT                                                         | CUAUGGGUCUCGACACUUA    |
| QPCT_2                    | J-012474-06, QPCT                                                         | GUACCGGUCUUUCUCAAU     |
| QPCT_3                    | J-012474-07, QPCT                                                         | CCCUAAAAGACUGUUUCAGA   |
| QPCT_4                    | J-012474-08, QPCT                                                         | GGAACUUGCUCGUGCCUUA    |
| <b>Non Target Control</b> | NTC                                                                       | unknown                |
| siRNA                     | Qiagen FlexiTube siRNA                                                    |                        |
| <b>pooled QPCT-siRNA</b>  | consist of                                                                | target sequence        |
| QPCT_5                    | Hs_QPCT_5                                                                 | CAGGTGGTTTCGAAAGACTTCA |
| QPCT_6                    | Hs_QPCT_7                                                                 | TTCGAAAGACTTCAAGCAATT  |
| QPCT_7                    | Hs_QPCT_8                                                                 | CAGGTTTCATTCATTCACGAT  |
| QPCT_8                    | Hs_QPCT_9                                                                 | CTCTATGGGTCTCGACACTTA  |

### Supplemental Table 2.

Primer sequences of the human genes

| Name              | Forward              | Reverse              |
|-------------------|----------------------|----------------------|
| <i>CCL2</i>       | GCCTCCAGCATGAAAGTCTC | CAGATCTCCTTGGCCACAAT |
| <i>ICAM1/CD54</i> | GGCTGGAGCTGTTTGAGAAC | TCACACTGACTGAGGCCTTG |
| <i>CX3CL1</i>     | TCTGCCATCTGACTGTCCTG | CTGTGCTGTCTCGTCTCCAA |
| <i>GAPDH</i>      | ACCCAGAAGACTGTGGATGG | TTCTAGACGGCAGGTCAGGT |
| <i>YWHAZ</i>      | AGCAGGCTGAGCGATATGAT | TCTCAGCACCTCCGTCTTT  |

## Fig 1 Supplement

### Conversion of Q1-CX3CL1 to pE1-CX3CL1 in human serum

At time point 0 min, the major peak corresponds to a mass of 8630, which is close to the theoretical molecular weight (8639) of Q1-CX3CL1. After incubating Q1-CX3CL1 with human serum for 30 min, the major peak corresponds to a mass of 8613, which is close to the theoretical molecular weight (8622) of pE1-CX3CL1. The doublet at 8286/8303 corresponds to a shortened peptide produced by limited proteolysis at the C-terminus (release of C-terminal RNG tripeptide). The C-terminal cleavage is independent of N-terminal cyclisation reaction.

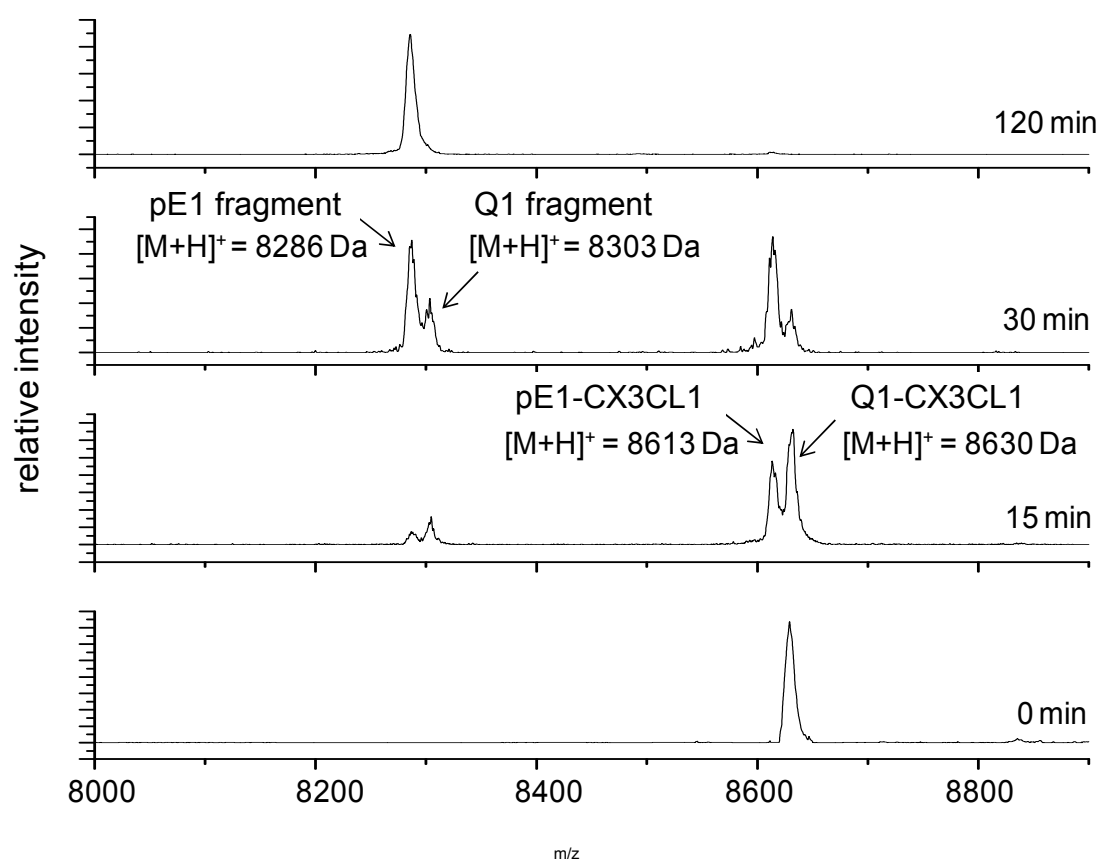

Supplement: bsr20170712_Supp1.pdf [file bsr20170712_Supp1.pdf]
